1 Curriculum

2

3

**The CURE for Cultivating Fastidious Microbes**

4 Arundhati Bakshi<sup>1</sup>, Austen T. Webber<sup>1</sup>, Lorelei E. Patrick<sup>1,2</sup>, E. William Wischusen<sup>1</sup>, and J.

5 Cameron Thrash<sup>1,3</sup>

6

7 1. Department of Biological Sciences, Louisiana State University, Baton Rouge, LA 70803, USA

8 2. Current address: Department of Biology Teaching and Learning, University of Minnesota,

9 Minneapolis, MN 55455, USA

10 3. Correspondence: thrashc@lsu.edu

11

12 Keywords: Undergraduate Research, Course-based Undergraduate Research Experience, CURE,

13 High-impact Practice, Bacterioplankton

14

15

16 **ABSTRACT**

17 Course-based Undergraduate Research Experiences (CUREs) expand the scientific educational  
18 benefits of research to large groups of students in a course setting. As part of an ongoing effort to  
19 integrate CUREs into first-year biology labs, we developed a microbiology CURE (mCURE)  
20 that uses a modified dilution-to-extinction high throughput culturing protocol for isolating  
21 abundant yet fastidious aquatic bacterioplankton during one semester. Students learn common  
22 molecular biology techniques like nucleic acid extraction, PCR, and molecular characterization;  
23 read and evaluate scientific literature; and receive training in scientific communication through  
24 written and oral exercises that incorporate social media elements. In the first three semesters, the  
25 mCUREs achieved similar cultivability success as implementation of the protocol in a standard  
26 laboratory setting. Our modular framework facilitates customization of the curriculum for use in  
27 multiple settings and we provide classroom exercises, assignments, assessment tools, and  
28 examples of student output to assist with implementation.

29

## 30 INTRODUCTION

31 Undergraduate research experiences in STEM increase student retention in science majors;  
32 increase the proportion of students that go on to professional or graduate school; as well as  
33 improve critical thinking skills, data interpretation skills, content knowledge, and attitudes  
34 toward science (1-5). Typical undergraduate research experiences are limited to relatively few  
35 students due to research lab size and funding, making these positions competitive, highly  
36 selective, and typically dominated by upper-level students (4, 5). Course-based undergraduate  
37 research experiences (CUREs), in which students experience research as part of a course, can  
38 reach students early in their degree program and accommodate large numbers of students, thus  
39 increasing the diversity of students participating in research (4, 5). Despite these benefits, the  
40 time necessary to plan CURE projects and create assignments and rubrics can restrict their use  
41 (6). Fortunately, an increasing number of publications have shared CURE implementation  
42 strategies for a variety of settings (3, 7-9). We recently outlined a flexible, modular CURE  
43 framework, including rubrics and course materials, that has facilitated conducting a variety of  
44 different research projects in first-year biology laboratory courses at Louisiana State University  
45 (LSU) (10). Using this framework, we have developed the microbiology CURE (mCURE)  
46 described herein that focuses on the cultivation of bacterioplankton from aquatic systems (**Fig.**  
47 **1**).

48

49 Bacterioplankton occupy marine and freshwater environments at cell concentrations typically  
50 between  $10^5$ - $10^7$  cells  $\text{mL}^{-1}$ , however traditional agar plate methods usually only cultivate 0.1-1%  
51 of the organisms present in a given sample (11), hampering our ability to understand the  
52 functions of a large majority of microorganisms. An improved high-throughput cultivation

53 (HTC) method combines serial dilution of samples with sterilized natural water and/or artificial  
54 seawater media (12-14). Many abundant taxa in aquatic systems have been successfully cultured  
55 using this approach, for example SAR11 *Alphaproteobacteria* (15-18), SUP05  
56 *Gammaproteobacteria* (19), SAR116 *Alphaproteobacteria* (12, 20), and members of the so-  
57 called “Oligotrophic Marine *Gammaproteobacteria*” (21). Artificial media facilitates more  
58 general application and modification (e.g., in salinity, carbon and nitrogen sources, etc.) to  
59 accommodate different environments, as well as the adaptation of the protocol to teaching  
60 laboratories. In the following mCURE, students execute a modified version of the HTC protocol  
61 utilized by the Thrash Laboratory at LSU (14, 22). The possibility of isolating new organisms  
62 provides a charismatic entrance into biological research where students experience a genuine  
63 excitement of discovery combined with their laboratory and communication training.

64

### 65 ***Intended audience***

66 This course teaches basic laboratory skills and molecular biology methods, such as DNA  
67 extraction and PCR, in the context of advanced microbial cultivation approaches and introduces  
68 students to identification of microorganisms with molecular techniques. The curriculum also  
69 includes exercises in reading and understanding primary literature and communicating science to  
70 different audiences. The course is intended for undergraduates at the first- or second- year level  
71 who are pursuing majors such as Biology and Microbiology.

72

### 73 ***Learning time***

74 We designed the mCURE for a semester timeline with a single three-hour laboratory section  
75 meeting once a week for a minimum of 13 weeks. The project is divided into four major

76 segments (color-coded in both **Figure 1** and **Table 1**). In weeks #2-4 (*orange*), students attempt  
77 to establish an initial culture of marine bacterioplankton using serial dilutions with the HTC  
78 protocol (22). Transfer of the initial cultures to larger flasks for further growth occurs during  
79 weeks #5-6 (*green*). During weeks #7-9 (*blue*), students extract DNA from the cultures and  
80 amplify the 16S rRNA gene with PCR. Amplified products are then sequenced for subsequent  
81 taxonomic identification of the microbes in week #10 (*yellow*). The remaining weeks (#11-13)  
82 are spent discussing poster construction and administering the final assessments. Note that the  
83 entire workflow does not require 13 weeks, but we have built in flexibility to allow for repeating  
84 one or more elements in case of failure.

85

### 86 *Prerequisite student knowledge*

87 Students are required to have basic prerequisite training and proficiency in biosafety level 1  
88 (BSL1) organisms and safety practices (23). No other prerequisites are required, however, high  
89 school biology and chemistry are recommended. Students receive training in many of the basic  
90 biology skills that they will utilize in other contexts and receive training in biosafety level 2  
91 (BSL2) protocols (see Safety Issues, below).

92

### 93 *Learning Outcomes*

94 In addition to the learning objectives outlined below, the format of the mCURE sections  
95 incorporate aspects of three high-impact practices: Undergraduate Research, Collaborative  
96 Assignments, and Writing Intensive (24).

97

98 By the end of the semester, students should be able to:

- 99 1. Properly handle and isolate microorganisms using serial dilutions with the HTC protocol;
- 100 2. Extract DNA and amplify 16S rRNA genes from pure cultures;
- 101 3. Use databases such as BLAST to identify unknown microorganisms;
- 102 4. Describe the relationship between the research objectives, the HTC approach, and the  
103 experimental design;
- 104 5. Read and interpret relevant articles from the primary literature;
- 105 6. Communicate the methods, results, and implications of their research to both scientific  
106 and non-scientific audiences.

107

## 108 **PROCEDURE**

109 A summary of the basic approach for the mCURE is shown in **Figure 1**, along with a week-by-  
110 week breakdown of activities, materials, and prep notes in **Table 1**.

111

## 112 ***Materials***

113 The required equipment and chemicals have been previously published (22). Briefly, because  
114 most highly abundant aquatic microorganisms have oligotrophic lifestyles, occur in low cell  
115 densities ( $< 10^7$  cells/mL), are very small ( $< 1\mu\text{m}$ ), and will not grow on solid media, the  
116 cultivation approach makes use of liquid media, and cell growth is measured using a benchtop  
117 flow cytometer (e.g., the Millipore Guava easyCyte). The primary marine medium recipe,  
118 MWH1, and our flow cytometer settings, are provided in **Appendices 1** and **2**, respectively.  
119 Alternative media recipes and preparation instructions are available elsewhere (14, 18). To avoid  
120 trace-metal contamination, all reusable cultivation vessels are made of polycarbonate plastic and  
121 acid-washed in 10% HCl. Other major items include a thermocycler and PCR reagents,

122 electrophoresis equipment and a gel viewing system (e.g., Bio-Rad Gel Doc), a DNA  
123 quantification system (e.g. Qubit, ThermoFisher), DNA extraction kits (MoBio PowerWater),  
124 pipettes/tips, and incubators. The only differences in the established protocol equipment (22) for  
125 the mCURE sections are the requirement for a biosafety cabinet and disposable 2.1 mL 96-well  
126 plates (Thermo Nunc A/S). For those without access to some or most of this equipment, we  
127 provide alternatives in the Discussion.

128

### 129 ***Student instructions***

130 Segment 1 (orange in **Figure 1, Table 1**): During the first two weeks of class, students are  
131 introduced to the overall mCURE approach, pipetting, and trained in BSL2 safety protocols.  
132 Each group of two students then dilutes their sample and inoculates seven wells of a 96-well  
133 plate (**Appendix 3**) containing the medium. An eighth well is inoculated with sterile media as a  
134 contamination control. Thus, a 24-student section initiates culturing in a 96-well plate. The plate  
135 is incubated at *in situ* temperature (based on time/place of sampling) for 2-3 weeks and then  
136 checked for growth using flow cytometry. During the incubation weeks, student assignments  
137 focus on introducing effective reading of scientific literature and on the experimental design and  
138 its rationale (**Table 1**).

139

140 Segment 2 (green): Each group selects 1-2 positive cultures (wells with  $> 10^4$  cells/mL) for  
141 transfer into larger volume growth flasks and creates cryostocks for culture preservation in 10%  
142 DMSO (**Appendix 4**). In our experience, most groups usually have at least one positive well to  
143 transfer. Those groups with no growth in any of their wells select an unused positive well from  
144 another group. Inoculated flasks are incubated for two weeks at the same temperature as before.

145 During the interim, students are introduced to scientific writing and give “lightning talks” (**Table**  
146 **1**).

147

148 Segment 3 (blue): Groups select at least one flask that shows growth and extract DNA  
149 (**Appendix 5**). In the three mCURE semesters detailed here, the majority of groups in any given  
150 section observed growth in at least one flask. Groups with no growth in any of their flasks use  
151 part of another group’s culture for extraction. Note that this introduces redundancy in the final  
152 identification results. Over the next two weeks, students amplify the 16S rRNA genes from their  
153 extracted DNA using PCR (**Appendix 6**) and confirm the amplification product with gel  
154 electrophoresis. Successful amplicons are then sequenced (possibly off-campus, e.g., the RTSF  
155 Genomics Core at Michigan State University).

156

157 Segment 4 (yellow): Students learn to assemble forward and reverse sequence reads into a contig  
158 and identify their isolate using the NCBI BLASTN portal (**Appendix 7**). Briefly, reads from both  
159 the forward and reverse primer, as well as the overlapping contig (if any), are searched against  
160 the GenBank nt database with and without the exclusion of uncultured/environmental samples.  
161 The % identity, Query coverage, E-value, and GenBank # for the top five BLAST hits are  
162 recorded for all searches and isolates. Interpretation and contextualization of the results,  
163 including the similarity of isolates generated by the students to those in the database, occurs via  
164 discussion with knowledgeable faculty/teaching assistants. These results become part of their  
165 final poster presentation.

166

167 ***Faculty instructions***



168 Segment 1 (grey, orange in **Figure 1, Table 1**): Prior to the beginning of the course, instructors  
169 must prepare the following:

- 170 1) Collect seawater ( $\geq 1\text{L}$ ) and measure the concentration of bacterioplankton using flow  
171 cytometry (**Appendix 2**). The students use this initial concentration to calculate the  
172 dilution factor required to inoculate  $\sim 1\text{-}5$  cells per well. Collection should occur as  
173 proximately to inoculation as possible to avoid microbial community change via bottle  
174 effects.
- 175 2) Prepare the low-nutrient media (**Appendix 1**;  $\sim 200$  mL per plate; 1 plate/12 groups).  
176 Aliquot  $\sim 1.7$  mL of media into each well of the 96-well plate just before class and allow  
177 time for equilibration to incubation temperature.
- 178 3) Select  $\sim 12\text{-}15$  scientific articles (examples in **Appendix 8**) relevant to the project and  
179 create a reading guide for one of them for class discussion (sample: **Appendix 9** for  
180 (12)). The students may select one of the remaining papers for their lightning talks  
181 (**Table 1**, weeks #4-5), and use them as references for their formal writing assignments.

182  
183 Because of the incubation period (2-3 weeks) for the initial inoculations, we recommend that  
184 Segment 1 involve at least one “holiday week” (**Table S1**). At the end of the incubation period,  
185 instructors count cells in the 96-well plate and record the well numbers positive for growth.  
186 Since isolates will be unknown at this time, transfers from incubation plates to counting plates  
187 (22) should be completed in a biosafety cabinet.

188  
189 Segment 2 (green): Prior to the start of this segment, instructors must prepare more medium,  
190 aliquot 50 mL into 125 mL flasks, and prepare cryotubes with DMSO. Prepare as many flasks

191 and cryotubes as the number of wells that show growth (with some extra on hand in case of  
192 spillage). Students should have access to a biosafety cabinet in which to handle all cultures. At  
193 the end of the 2-week incubation, instructors count flasks to determine growth and record cell  
194 concentrations for student use. For the scientific writing discussion, we have made an activity  
195 (**Appendix 10**) that familiarizes students with the content in various sections of a paper (12).

196

197 Segment 3 (blue): We recommend that instructors aliquot the required amount of DNA  
198 extraction reagents (**Appendix 5**- Power Water DNA Isolation Kit; Mo Bio Laboratories) and  
199 PCR reagents (**Appendix 6**- Taq, MgCl<sub>2</sub>, and buffer- ThermoFisher; 10mM AMRESCO dNTPs-  
200 VWR Life Sciences; 27F/1492R primers) for each group to prevent cross-contamination. For gel  
201 electrophoresis, gels are made with 1.5% agarose in DI MilliQ-filtered water. We suggest  
202 making an appropriate amount of agarose in a flask for each section, and allowing it to solidify  
203 until class time. Then, prior to the start of class, the instructor can melt the agarose in the flask  
204 and have it ready for students to pour their own gels. We recommend gels contain enough wells  
205 that each student has 1-2 wells to practice loading sample dye before loading their PCR product  
206 into one of the remaining wells. Students combine 1 µL loading dye with 5 µL PCR products for  
207 imaging. We typically employ a Lambda or 1 kb ladder. Gels are stained with SYBR green (1x)  
208 and imaged using the Bio-Rad Gel Doc.

209

210 Segment 4 (yellow): Before the BLAST lab, instructors need to have all successful 16S rRNA  
211 gene amplicons sequenced from a facility of their choice using both forward and reverse primers  
212 (we use 27F and 1492R, but this can be specified by the instructor- see (25) for additional  
213 options); the resulting sequences should be made available where the students can access them.

214 Label each sequence with the sample number and whether it is a “forward” or a “reverse” read.  
215 We recommend the “BLAST behind the scenes” activity (**Appendix 11**) to introduce students to  
216 the concept of sequence analysis. We have included the relevant lecture materials on molecular  
217 characterization (**Appendix 12**) to aid the instructor. Briefly, we introduce PCR, the importance  
218 of primers in PCR, describe the presence of conserved sequences flanking the hypervariable  
219 regions within 16S rRNA genes, and how the primers must be designed to recognize the  
220 conserved portion of the rRNA genes and amplify the hypervariable region they flank. We then  
221 discuss how Sanger sequencing can be used to read the DNA code and compared to other  
222 previously sequenced organisms using BLAST.  
223  
224 Finally, instructors need to prepare for a poster session at the end of the semester, including  
225 organizing space for poster boards, display tables, and printing facilities. However, for grading  
226 purposes, we recommend that the student groups present their posters electronically in class.  
227 During this time, other students and the instructor can offer constructive criticism for the  
228 students to incorporate into the final printed version of the poster.  
229  
230 Based on our experience implementing this mCURE for several semesters, we anticipate at least  
231 1-2 protocol failures per semester; hence, flexibility is built into the framework (**Tables 1, S1**).  
232 Despite our anticipation of some failures and correcting these in subsequent semesters (e.g.,  
233 students failing to properly transfer and freeze their samples), each new semester has presented  
234 us with new and different failures (e.g., flow cytometer reagents on back-order, failed PCRs due  
235 to old reagents). Many non-experimental activities, such as the lightning talks, can be easily  
236 inserted at different points in the course, amended to take less time, or even completely

237 eliminated. Similarly, other related activities may be added, such as peer review of initial formal  
238 writing drafts and using social media for science outreach (*e.g.* we use the Twitter and Instagram  
239 hashtag #LSUCURE for all CURE efforts in the Department of Biological Sciences at LSU;  
240 **Table S1**). If feasible, we recommend adding the following enhancements to further engage  
241 students in the course: (i) taking students on a field trip, such as a one-day research cruise to  
242 collect water samples; (ii) demonstrating the use of “behind the scenes” equipment, such as the  
243 flow cytometer, capillary sequencer, and/or modern microscopes used to image bacteria.

244

#### 245 *Suggestions for determining student learning*

246 The mCURE is an authentic research experience and therefore one important component is  
247 communication of student findings for both scientific and non-scientific communities. Thus,  
248 assessment of student learning is largely split between the students successfully completing the  
249 protocols and the final poster presentation (**Table 2**). In order to complete the entire project,  
250 students need to be able culture bacterioplankton with the HTC protocol, passage cultures to  
251 larger volumes, extract DNA from these cultures, then successfully amplify and identify 16S  
252 rRNA gene sequences. The final poster and presentation requires students to state the aims of the  
253 project within the larger context of what is currently known about bacterioplankton in marine  
254 environments, outline the basic methodologies used, clearly present their results, and discuss  
255 these results in the context of their research question. Finally, the students suggest the next  
256 logical question to explore. Each of the laboratory and communication elements has multiple  
257 forms of evaluation (**Table 2** and **Appendices**).

258

#### 259 *Sample data*

260 Fall 2015, spring 2016, and fall 2016 average cultivability (13) was 9.9, 2.8, and 12%,  
261 respectively. These cultivability numbers generally match the success rate of other HTC  
262 experiments (14) and demonstrate a significant improvement over “traditional” methods (11).  
263 The number of unique pure cultures that survived successive transfers and were positively  
264 identified at the end of each course was 28 (fall 2015), 13 (spring 2016), and 23 (fall 2016). In  
265 total, mCURE sections isolated 43 unique bacterioplankton during the first three semesters  
266 reported herein. Some courses isolated taxa identified in a previous mCURE, so the overall total  
267 was smaller than the sum of the individual semesters. Many of the isolates have close  
268 relationships to organisms previously cultured using HTC in the Thrash lab and other labs, as  
269 indicated by taxonomic affiliations to strains with “LSUCC”, “HTCC”, “HIMB”, or “IMCC”  
270 designations (**Table 3**). Importantly, many isolates represent abundant marine clades (14), thus  
271 the results validate the mCURE approach to produce valuable cultures with similar efficacy as  
272 HTC experiments conducted under more typical laboratory settings. Additional results are  
273 provided in **Appendix 13**.

274

### 275 *Safety issues*

276 Since the curriculum involves isolating unknown organisms, students must be proficient in BSL1  
277 safety techniques prior to taking the course. All activities that involve handling live  
278 microorganisms should occur under BSL2 safety protocols, as outlined by the JMBE Biosafety  
279 Guidelines for Handling Microorganisms in the Teaching Laboratory (23). The specific activities  
280 requiring BSL2 protocols are indicated in Table 1. Additional safety measures must be taken for  
281 faculty during washing and preparation of medium mixture bottles and growth flasks. See (22)  
282 for more details.

283  
284  
285  
286  
287  
288  
289  
290  
291  
292  
293  
294  
295  
296  
297  
298  
299  
300  
301  
302  
303  
304  
305

## DISCUSSION

### *Field testing*

Here we report results from mCURE sections offered during the fall 2015 and 2016 semesters in Biology 1207 (Honors: Biology Laboratory for Science Majors) and spring 2016 in Biology 1208 (Biology Laboratory for Science Majors I). There were four sections per semester taught by two graduate teaching assistants (two sections each), with up to 28 students per section. Biology 1207 is only offered in the fall semester and consists of a total of four sections. Multiple (12-50) sections of Biology 1208 are offered every semester, a few of which are typically offered as CUREs as outlined in our previous publication (10); students do not know when they register for this course if their section will be in a CURE or traditional format. We note that these previous sections of the mCURE were conducted with a BSL1 safety protocol. The current protocol offered in this manuscript has been updated with BSL2 safety measures in response to recommendations by ASM (23). In each of these sections, some fraction of student groups (pairs) were capable of successfully implementing the protocols from start to finish, while others had failures that required they use cultures, DNA, or PCR products from other groups. In general, we found that roughly a third of the groups could successfully complete the entire workflow (however, failure at any given step did not preclude students from progressing to the next step, albeit with successful cultures from a different group). This represents only one of the learning outcomes. Other learning outcomes (**Table 2**) could be achieved regardless of students experiencing failure at different stages (detailed below).

306 *Evidence of student learning*

307 We provide evidence of student learning with example summative assessment of grade  
308 distributions (**Fig. 2**), physical data (PCR products- **Fig. 3**), qualitative results of successfully  
309 completed bacterioplankton isolation (**Table 3**), and examples of the range of student  
310 communication outcomes (**Table 4, Appendix 22**).

311  
312 **Figure 2** details the grade distributions across two sections from each semester during the 2015-  
313 2016 school year, composed of students with differing levels of academic preparation. The fall  
314 2015 sections consisted of Honors College students majoring in biology, many of whom were  
315 already familiar with basic laboratory techniques. These students did not perform the original  
316 dilution of the seawater before inoculation. This class generally performed well on quizzes,  
317 which tested their proficiency in one or two of the major topics covered in the prior week of the  
318 course. Nearly the entire class received a grade of either A or B on the cumulative final exam  
319 (**Appendix 18, Fig. 2**). In spring 2016, we offered the mCURE in BIOL 1208R. Spring is the  
320 “off” semester for this course such that students enrolled in it usually are not biology majors or  
321 experienced some barrier to their enrollment or completion of the course in the preceding fall  
322 semester. This semester we asked students to perform their own seawater dilution. Many  
323 students found this difficult, as reflected in the Q1 and Q2 scores (**Fig. 2**). However, we note that  
324 by the final exam most students were proficient in these calculations. At the end of the semester,  
325 ~75% of the class received a passing grade (A-C) on the final exam, which is typical for the  
326 traditional lab sections during the spring semester of this course.

327

328 In addition to demonstrating their knowledge on summative assessments, students became  
329 proficient in laboratory techniques (Learning Outcomes 1-2) as evidenced by the vast majority of  
330 student groups in both semesters who successfully extracted DNA from cultures and performed  
331 PCR (e.g., **Fig. 3**). By the end of the semester, students were expected to understand and  
332 interpret primary literature related to their research and describe their cultured microbe in the  
333 final poster. Thus, the posters partially address Learning Outcomes 3-6, with other writing  
334 assignments providing additional training (**Table 2**). **Table 4** provides excerpts from student  
335 posters describing their isolated organism. The top performing students included detailed  
336 description of scientific literature related to their organism and proposed future experiments to  
337 expand our knowledge about their isolate. Their writing was concise while including all  
338 important and relevant details and showed a thorough understanding of the experimental design.  
339 We provide examples of formal writing assignment 2, lightning talks, and student posters in  
340 **Appendix 22** (shared with permission from the students).

341

### 342 *Possible modifications*

343 We appreciate that many instructors may wish to implement the mCURE design but may not  
344 have access to some of the more expensive equipment used in our protocol. Here are a few  
345 modifications to circumvent some of these restrictions. Instructors can replace flow cytometry  
346 with direct microscopic counts, e.g., as in some of the earlier iterations of the HTC protocol (12).  
347 For those without access to either a flow cytometer or a fluorescence microscope, the protocol  
348 can still be completed using traditional agar-plate based methods. Our media can be prepared  
349 with agar (22) or replaced with a classic marine medium like Difco 2216 (BD). Although solid  
350 media generally select for different taxa than liquid media, for the purposes of a basic biology



351 laboratory, this may not matter. After streaking a seawater sample on plates, individual colonies  
352 can be picked, grown up in liquid culture to increase cellular mass, or directly processed through  
353 DNA extraction. Colony PCR (26) may also be an attractive alternative identification method,  
354 particularly because this also eliminates the time and cost associated with DNA extraction. These  
355 last two steps may also help adapt the overall protocol for shorter time frames, e.g., academic  
356 quarters instead of semesters. Please note that our protocol uses low-nutrient and low-carbon  
357 media that typically selects for non-pathogenic, oligotrophic marine bacterioplankton (14). The  
358 use of rich media and plate-based methods may increase the risk of cultivating pathogenic  
359 organisms. Finally, for those interested in freshwater environments, the same protocol can be  
360 conducted with freshwater media, either artificial (18, 27) or natural (28).

361

## 362 **SUPPLEMENTAL MATERIALS**

363 **Table S1.** Example of a real implementation schedule of the idealized template in Table 1.

364 **Appendix 1.** MWH1 marine medium recipe

365 **Appendix 2.** Flow cytometry parameters

366 **Appendix 3.** Inoculation Protocol

367 **Appendix 4.** Transfer and Cryostock Protocol

368 **Appendix 5.** DNA Extraction Protocol

369 **Appendix 6.** PCR protocol

370 **Appendix 7.** BLAST How-to Guide

371 **Appendix 8.** Suggested literature

372 **Appendix 9.** Reading Guide

373 **Appendix 10.** Ordering a Scientific Paper

374 **Appendix 11.** BLAST Behind the Scenes

375 **Appendix 12.** Molecular biology lectures (as PowerPoint slides). If readers would like assistance  
376 in developing other PowerPoints such as these, please contact the lead author.

377 **Appendix 13.** Supplemental results

378 **Appendix 14.** Informal Writing 1

379 **Appendix 15.** Informal Writing 2

380 **Appendix 16.** Formal Writing 1

381 **Appendix 17.** Formal Writing 2

382 **Appendix 18.** Sample Final Exam

383 **Appendix 19.** Lightning talk rubric

384 **Appendix 20.** Quizzes

385 **Appendix 21.** Poster rubric

386 **Appendix 22.** Example Student Assignments

387 Appendix 23. Example lightning talk and instructions (as PowerPoint slides).

388

## 389 **ACKNOWLEDGMENTS**

390 We wish to thank Dr. Chris Gregg, Ann Dickey-Jolissaint, and Brooke Trabona for coordinating

391 the labs and prepping many of the lab materials behind the scenes. David Morris and Celeste

392 Lanclos served as additional graduate and undergraduate TAs, respectively. Andrew Flick and

393 Dr. Paige Jarreau were instrumental in incorporating social media assignments into the

394 curriculum. The Socolofsky Microscopy Center provided images of some of the microbes

395 cultured by students and gave students tours of the facility. We thank the crew of the *R/V*

396 *Acadiana* and Murt Conover at the Louisiana Universities Marine Consortium for assisting with

397 logistics and field training. We are grateful to Dean Cynthia Peterson for her support of CUREs

398 in the Department of Biological Sciences. Funding for this project was awarded through the

399 Student Excellence Fee from the College of Science.

400

## 401 **REFERENCES**

402 1. Lopatto D. 2007. Undergraduate Research Experiences Support Science Career Decisions  
403 and Active Learning. *CBE-Life Sciences Education* 6:297-306.

404 2. Brownell SE, Hekmat-Scafe DS, Singla V, Chandler Seawell P, Conklin Imam JF, Eddy  
405 SL, Stearns T, Cyert MS. 2015. A High-Enrollment Course-Based Undergraduate

- 406 Research Experience Improves Student Conceptions of Scientific Thinking and Ability to  
407 Interpret Data. *CBE-Life Sciences Education* 14(2): ar21.
- 408 3. Olimpo JT, Fisher GR, DeChenne-Peters SE. 2016. Development and Evaluation of the  
409 Tigriopus Course-Based Undergraduate Research Experience: Impacts on Students'  
410 Content Knowledge, Attitudes, and Motivation in a Majors Introductory Biology Course.  
411 *CBE-Life Sciences Education* 15(4): ar72.
- 412 4. Linn MC, Palmer E, Baranger A, Gerard E, Stone E. 2015. Undergraduate research  
413 experiences: Impacts and opportunities. *Science* 347:1261757-1-6.
- 414 5. Shapiro C, Moberg-Parker J, Toma S, Ayon C, Zimmerman H, Roth-Johnson EA,  
415 Hancock SP, Levis-Fitzgerald M, Sanders ER. 2015. Comparing the Impact of Course-  
416 Based and Apprentice-Based Research Experiences in a Life Science Laboratory  
417 Curriculum. *Journal of Microbiology & Biology Education* 16:186-197.
- 418 6. Spell RM, Guinan JA, Miller KR, Beck CW. 2014. Redefining Authentic Research  
419 Experiences in Introductory Biology Laboratories and Barriers to Their Implementation.  
420 *CBE-Life Sciences Education* 13:102-110.
- 421 7. Thompson SK, Neill CJ, Wiederhoeft E, Cotner S. 2016. A Model for a Course-Based  
422 Undergraduate Research Experience (CURE) in a Field Setting†. *Journal of*  
423 *Microbiology & Biology Education* 17:469-471.
- 424 8. Cotner S, Hebert S. 2016. Bean Beetles Make Biology Research Sexy. *The American*  
425 *Biology Teacher* 78:233-240.
- 426 9. Miller CW, Hamel J, Holmes KD, Helmey-Hartman WL, Lopatto D. 2013. Extending  
427 your research team: Learning benefits when a laboratory partners with a classroom.  
428 *BioScience* 63:754-762.
- 429 10. Bakshi A, Patrick LE, Wischusen EW. 2016. A Framework for Implementing Course-  
430 Based Undergraduate Research Experiences (CUREs) in Freshman Biology Labs. *The*  
431 *American Biology Teacher* 78:448-455.
- 432 11. Staley JT, Konopka A. 1985. Measurement of in Situ Activities of Nonphotosynthetic  
433 Microorganisms in Aquatic and Terrestrial Habitats. *Annual Review of Microbiology*  
434 39:321-346.
- 435 12. Connon SA, Giovannoni SJ. 2002. High-throughput methods for culturing  
436 microorganisms in very-low-nutrient media yield diverse new marine isolates. *Applied*  
437 *and Environmental Microbiology* 68:3878-3885.
- 438 13. Button DK, Schut F, Quang P, Martin R, Robertson BR. 1993. Viability and isolation of  
439 marine bacteria by dilution culture: theory, procedures, and initial results. *Applied and*  
440 *Environmental Microbiology* 59:881-891.
- 441 14. Henson MW, Pitre DM, Weckhorst J, Lanclos VC, Webber AT, Thrash JC. 2016.  
442 Artificial Seawater Media Facilitate Cultivating Members of the Microbial Majority from  
443 the Gulf of Mexico. *mSphere* 1:e00028-16. doi:10.1128/mSphere.00028-16.
- 444 15. Rappé MS, Connon SA, Vergin KL, Giovannoni SJ. 2002. Cultivation of the ubiquitous  
445 SAR11 marine bacterioplankton clade. *Nature* 418:630-633.
- 446 16. Stingl U, Tripp HJ, Giovannoni SJ. 2007. Improvements of high-throughput culturing  
447 yielded novel SAR11 strains and other abundant marine bacteria from the Oregon coast  
448 and the Bermuda Atlantic Time Series study site. *The ISME Journal* 1:361-371.
- 449 17. Song J, Oh H-M, Cho J-C. 2009. Improved culturability of SAR11 strains in dilution-to-  
450 extinction culturing from the East Sea, West Pacific Ocean. *FEMS Microbiology Letters*  
451 295:141-147.

- 452 18. Henson MW, Lanclos VC, Faircloth BC, Thrash JC. 2018. Cultivation and genomics of  
453 the first freshwater SAR11 (LD12) isolate. *The ISME Journal AOP*.
- 454 19. Marshall IPG, Blainey PC, Spormann AM, Quake SR. 2012. A Single-Cell Genome for  
455 *Thiovulum* sp. *Applied and Environmental Microbiology* 78:8555-8563.
- 456 20. Yang S-JJ, Kang I, Cho J-CC. 2016. Expansion of Cultured Bacterial Diversity by Large-  
457 Scale Dilution-to-Extinction Culturing from a Single Seawater Sample. *Microbial*  
458 *ecology* 71:29-43.
- 459 21. Cho JC, Giovannoni SJ. 2004. Cultivation and growth characteristics of a diverse group  
460 of oligotrophic marine Gammaproteobacteria. *Applied and Environmental Microbiology*  
461 70:432-440.
- 462 22. Thrash JC, Weckhorst JL, Pitre DM. 2015. Cultivating Fastidious Microbes. *In* McGenity  
463 TJ, Timmis KN, Nogales B (ed), *Hydrocarbon and Lipid Microbiology Protocols:*  
464 *Isolation and Cultivation*, vol 4: 57-58. Springer-Verlag Berlin Heidelberg. ISBN 978-3-  
465 662-45179-3
- 466 23. Emmert EAB, Biosafety ATCoL. 2013. Biosafety Guidelines for Handling  
467 Microorganisms in the Teaching Laboratory: Development and Rationale. *Journal of*  
468 *Microbiology & Biology Education* 14:78-83.
- 469 24. Kuh GD. 2008. High-Impact Educational Practices: What They Are, Who Has Access to  
470 Them, and Why They Matter. Association of American Colleges and Universities,  
471 Washington, DC.
- 472 25. Klindworth A, Pruesse E, Schweer T, Peplies J, Quast C, Horn M, Glöckner FO. 2013.  
473 Evaluation of general 16S ribosomal RNA gene PCR primers for classical and next-  
474 generation sequencing-based diversity studies. *Nucleic Acids Research* 41:e1-e1.
- 475 26. Bergkessel M, Guthrie C. 2013. Chapter 25- Colony PCR. *Methods in Enzymology*. 529:  
476 299-309.
- 477 27. Oberhardt MA, Zarecki R, Gronow S, Lang E, Klenk H-P, Gophna U, Ruppin E. 2015.  
478 Harnessing the landscape of microbial culture media to predict new organism-media  
479 pairings. *Nature Communications* 6.
- 480 28. Garcia SL, McMahon KD, Grossart HP, Warnecke F. 2014. Successful enrichment of the  
481 ubiquitous freshwater acI Actinobacteria. *Environmental Microbiology Reports* 6:21-27.

482  
483  
484

485 **Table 1.** The mCURE framework. Activities, associated assessments, faculty instructions, and the relevant  
486 supporting documents are detailed week-by-week. The various segments of the course are color coded (grey, orange,  
487 green, blue, and yellow), consistently with the flowchart in Figure 1.  
488

| Week | Topic                                                                              | Quiz | Quiz Topic                                            | In-class (Group) Activity                                                                                            | Assignments & Reminders                                                                                                     | Instructor Prep Notes                                                                                         | Supporting Documents                                                 | Other Supporting Documents <sup>a</sup> |
|------|------------------------------------------------------------------------------------|------|-------------------------------------------------------|----------------------------------------------------------------------------------------------------------------------|-----------------------------------------------------------------------------------------------------------------------------|---------------------------------------------------------------------------------------------------------------|----------------------------------------------------------------------|-----------------------------------------|
| #1   | Meet & greet;<br>Basic intro to research question                                  |      |                                                       | Familiarize students with BSL-2 safety guidelines                                                                    | Research paper (#1) reading assigned                                                                                        | Collect seawater & measure conc.; prep media and aliquot into 96-well plate                                   | Course outline flowchart (Fig. 1)                                    |                                         |
| #2   | Expt. design; pipetting & sterile technique; Scientific record-keeping             |      |                                                       | Research paper (#1) introduced; Dilute seawater & inoculate 96-well plates**                                         |                                                                                                                             | Incubate cultures under optimum conditions for 2-3 weeks.                                                     | Inoculation protocol; Reading guide                                  |                                         |
| #3   | How to read scientific literature                                                  | 1    | Dilutions, pipetting & sterile technique              | Decode & understand main points in a scientific paper; Other research papers introduced as part of in-class activity | HW based on research paper (#1) assigned <sup>1</sup>                                                                       |                                                                                                               |                                                                      | How to Read a Scientific Paper          |
| #4   | Experimental design                                                                | 2    | Decoding scientific literature                        | Interactive discussion re: experimental design (compare & contrast methodology with paper #1)                        | HW based on research paper (#1) due; Student groups choose one from a pool of papers for the “lightning talks” <sup>2</sup> | Perform flow-cytometry to determine positive cultures <sup>3</sup> ; prep media in flasks; prep cryostocks    |                                                                      |                                         |
| #5   | Transfer & back-up; Discuss importance of back-ups; “Lightning talks” <sup>2</sup> | 3    | Expt. design                                          | Transfer isolates to larger volume; prepare cryostocks**                                                             | Formal Writing #1 assigned; Informal Writing #1 assigned                                                                    | Incubate flasks under optimum conditions for ~2 weeks                                                         | Formal Writing #1 guide & rubric; Informal Writing #1 guide & rubric | Writing Rubric                          |
| #6   | Scientific Writing                                                                 | 4    | Expt. design (contd.) – focus on transfers & back-ups | Order the sections of a scientific paper; Evaluate excerpts of scientific papers based on guide & rubric             | Informal Writing #1 due                                                                                                     | Perform flow-cytometry to determine positive cultures <sup>3</sup> ; Prep aliquots of DNA extraction reagents | Order a scientific paper                                             | Scientific Writing                      |
| #7   | DNA extraction                                                                     |      |                                                       | Perform DNA extraction of isolates**                                                                                 | Feedback on Informal Writing #1 returned                                                                                    | Design & purchase 16S rRNA gene primers; aliquot PCR reagents                                                 |                                                                      |                                         |
| #8   | PCR; Primer choice & design                                                        | 5    | DNA extraction                                        | Perform PCR of isolates                                                                                              | Formal Writing #1 due                                                                                                       | Prep agarose gels                                                                                             |                                                                      |                                         |

|     |                                                          |   |                              |                                                                                                                    |                                                                                                               |                                               |                                                                      |                                |
|-----|----------------------------------------------------------|---|------------------------------|--------------------------------------------------------------------------------------------------------------------|---------------------------------------------------------------------------------------------------------------|-----------------------------------------------|----------------------------------------------------------------------|--------------------------------|
| #9  | Gel electrophoresis & Sanger sequencing                  | 6 | PCR & primer design          | Perform gel electrophoresis to confirm PCR products                                                                | Formal Writing #2 <sup>4</sup> assigned; Informal Writing #2 assigned; Feedback on Formal Writing #1 returned | Perform Sanger Sequencing on positive samples | Formal Writing #2 guide & rubric; Informal Writing #2 guide & rubric |                                |
| #10 | BLAST sequences & identify microbes                      | 7 | Electrophoresis & sequencing | Manually compare a set of sequences to identify the most closely related organisms; Identify the cultured microbes | Informal Writing #2 due; HW on poster critique assigned <sup>5</sup>                                          |                                               | BLAST: How-to guide; BLAST behind the scenes                         | Poster Critique                |
| #11 | Elements of poster design; Poster development & critique | 8 | BLAST                        | Design rough drafts of posters; Peer poster critique session                                                       | HW on poster critique due; Feedback on Informal Writing #2 returned                                           |                                               |                                                                      | Designing Scientific Posters   |
| #12 | Final Exam                                               |   |                              |                                                                                                                    | Formal Writing #2 due                                                                                         |                                               |                                                                      |                                |
| #13 | Poster Presentations; Peer Evaluation & Reflections      |   |                              |                                                                                                                    |                                                                                                               |                                               |                                                                      | Poster Rubric; Peer Evaluation |

489

490 <sup>a</sup> Available as Supplemental Materials from Bakshi, A., *et al.*, *A Highly Scalable General Framework for*  
 491 *Implementing Course-based Undergraduate Research Experiences (CUREs) in Freshman Biology Labs*. American  
 492 Biology Teacher, 2016. **78**(6): p. 1-7.

493 <sup>1</sup> Basic questions to engage students in background information and the major take-home points from the research  
 494 article

495 <sup>2</sup> Students give 5-minute presentations on a relevant research article of their choice from a pool of papers made  
 496 available by the instructor (these papers are to be then used in the future as references in Formal Writings)

497 <sup>3</sup> Students are encouraged to make an appointment with the instructor to observe how the flow cytometer works.

498 <sup>4</sup> Students are required to find primary literature to include with this assignment

499 <sup>5</sup> Evaluate publicly displayed posters within the department for clarity and style; designed to familiarize students  
 500 with various poster designs

501 \*\*BSL2 laboratory protocols required.

502 Abbreviations: HW – Homework; Expt. = Experimental; Prep = Prepare (for student use); Conc. = concentration

503

504 **Table 2. Determination of Student Learning**

| <b>Learning Outcome (artifact)</b>                                                                                                | <b>Assessment Method(s)*</b>                                                                                                                                   |
|-----------------------------------------------------------------------------------------------------------------------------------|----------------------------------------------------------------------------------------------------------------------------------------------------------------|
| 1. Properly handle and isolate microorganisms using serial dilutions with the HTC protocol (isolated organisms).                  | Informal Writing 1 (Appendix 14), Formal Writing 1 (Appendix 16), successful completion of the protocols, results presented in the final poster (Appendix 21). |
| 2. Extract DNA and amplify 16S rRNA genes from pure cultures (16S rRNA gene amplicons).                                           | Informal Writing 2 (Appendix 15), Formal Writing 2 (Appendix 17), successful completion of the protocols, results presented in the final poster (Appendix 21). |
| 3. Use databases such as BLAST to identify unknown microorganisms (taxonomic identity).                                           | Formal Writing 2 (Appendix 17), successful completion of the protocols, results presented in the final poster (Appendix 21).                                   |
| 4. Describe the relationship between the research objectives, the HTC approach, and the experimental design.                      | Formal Writing 2 (Appendix 17), final poster (Appendix 21).                                                                                                    |
| 5. Read and interpret relevant articles from the primary literature.                                                              | Lighting Talks (Appendix 19), Formal Writing 2 (Appendices 17), final poster (Appendix 21).                                                                    |
| 6. Communicate the methods, results, and implications of their research to both scientific and non-scientific audiences (poster). | Lighting Talks (Appendix 19), final poster (Appendix 21).                                                                                                      |

505

506 \*Rubrics for both the writing assignments have been published previously (10).



507

508 **Table 3.** Bacteria cultured by mCURE students

| <b>Closest unique cultured relative</b>             | <b>Major Taxonomic Group</b>          |
|-----------------------------------------------------|---------------------------------------|
| <b>Arthrobacter sp. 210_2</b>                       | Actinomycetales; Actinobacteria       |
| <b>Marinobacterium sp. IMCC1424</b>                 | Actinomycetales; Actinobacteria       |
| <b>Microbacterium esteraromaticum strain V45.13</b> | Actinomycetales; Actinobacteria       |
| <b>Microbacterium sp. Ni17</b>                      | Actinomycetales; Actinobacteria       |
| <b>Nocardioides exalbidus strain DS1-2B</b>         | Actinomycetales; Actinobacteria       |
| <b>Nocardioides hwasunensis strain XH199</b>        | Actinomycetales; Actinobacteria       |
| <b>Alteromonadales bacterium 3tb13</b>              | Alteromonadales; Gammaproteobacteria  |
| <b>Alteromonas macleodii</b>                        | Alteromonadales; Gammaproteobacteria  |
| <b>Alteromonas tagae</b>                            | Alteromonadales; Gammaproteobacteria  |
| <b>Marinomonas sp. SS8</b>                          | Alteromonadales; Gammaproteobacteria  |
| <b>Porticoccus hydrocarbonoclasticus</b>            | Alteromonadales; Gammaproteobacteria  |
| <b>Pseudoalteromonas phenolica</b>                  | Alteromonadales; Gammaproteobacteria  |
| <b>Pseudoalteromonas sp. A-3</b>                    | Alteromonadales; Gammaproteobacteria  |
| <b>Shewanella sp. 49WBP</b>                         | Alteromonadales; Gammaproteobacteria  |
| <b>Bacillus sp. L1(2012)</b>                        | Bacillales; Firmicutes                |
| <b>Burkholderiales bacterium LSUCC0118</b>          | Burkholderiales; Betaproteobacteria   |
| <b>Limnobacter sp. MYOU6</b>                        | Burkholderiales; Betaproteobacteria   |
| <b>Haliaceae bacterium LSUCC0247</b>                | Haliaceae; Gammaproteobacteria        |
| <b>Gamma proteobacterium SF293</b>                  | OM182; Gammaproteobacteria            |
| <b>Gamma proteobacterium IMCC15037</b>              | OM252; Gammaproteobacteria            |
| <b>Gammaproteobacteria bacterium LSUCC0258</b>      | OM252; Gammaproteobacteria            |
| <b>Gammaproteobacteria bacterium LSUCC0272</b>      | OM252; Gammaproteobacteria            |
| <b>Marine gamma proteobacterium HTCC2080</b>        | OM60/NOR5; Gammaproteobacteria        |
| <b>Agrobacterium sp. TSH97</b>                      | Rhizobiales; Alphaproteobacteria      |
| <b>Anderseniella baltica</b>                        | Rhizobiales; Alphaproteobacteria      |
| <b>Anderseniella baltica strain BA141</b>           | Rhizobiales; Alphaproteobacteria      |
| <b>Rhizobium sp. MSSRF QS100</b>                    | Rhizobiales; Alphaproteobacteria      |
| <b>Bacterium HIMB11</b>                             | Rhodobacterales; Alphaproteobacteria  |
| <b>Rhodobacteraceae bacterium LSUCC0246</b>         | Rhodobacterales; Alphaproteobacteria  |
| <b>Rhodobacteraceae bacterium LSUCC0259</b>         | Rhodobacterales; Alphaproteobacteria  |
| <b>Roseobacter sp. strain WM2</b>                   | Rhodobacterales; Alphaproteobacteria  |
| <b>Altererythrobacter ishigakiensi</b>              | Sphingomonadales; Alphaproteobacteria |
| <b>Erythrobacteraceae bacterium LSUCC0210</b>       | Sphingomonadales; Alphaproteobacteria |
| <b>Erythrobacteraceae bacterium LSUCC0236</b>       | Sphingomonadales; Alphaproteobacteria |

|                                               |                                       |
|-----------------------------------------------|---------------------------------------|
| <b>Erythrobacteraceae bacterium LSUCC0240</b> | Sphingomonadales; Alphaproteobacteria |
| <b>Erythrobacteraceae bacterium LSUCC0267</b> | Sphingomonadales; Alphaproteobacteria |
| <b>Bacterium MH1</b>                          | Vibrionales; Gammaproteobacteria      |
| <b>Vibrio chagasii</b>                        | Vibrionales; Gammaproteobacteria      |
| <b>Vibrio pelagius</b>                        | Vibrionales; Gammaproteobacteria      |
| <b>Vibrio proteolyticus</b>                   | Vibrionales; Gammaproteobacteria      |
| <b>Vibrio sp. 0208F3</b>                      | Vibrionales; Gammaproteobacteria      |
| <b>Vibrio sp. PaH3.31d</b>                    | Vibrionales; Gammaproteobacteria      |
| <b>Vibrio sp. TP187</b>                       | Vibrionales; Gammaproteobacteria      |

---

509

510

511 **Table 4. Excerpts from students' posters describing the bacteria they cultured.** Students  
 512 were expected to identify and describe major points of interest regarding the bacteria they  
 513 cultured, supported by scientific literature references, relate that information back to the  
 514 experimental design, and identify a future direction for their work. Minor spelling and  
 515 grammatical errors have been fixed when reformatting the excerpts to fit the format of this table.

|                              | <b>Excerpts about the cultured organisms from students' posters</b>                                                                                                                                                                                                                                                                                                                                                                                                                                                                                                                                                                                                                                                                                                                                                                                                                                                                                                                                                                                                                                                                                   |
|------------------------------|-------------------------------------------------------------------------------------------------------------------------------------------------------------------------------------------------------------------------------------------------------------------------------------------------------------------------------------------------------------------------------------------------------------------------------------------------------------------------------------------------------------------------------------------------------------------------------------------------------------------------------------------------------------------------------------------------------------------------------------------------------------------------------------------------------------------------------------------------------------------------------------------------------------------------------------------------------------------------------------------------------------------------------------------------------------------------------------------------------------------------------------------------------|
| <b>Excellent</b>             | <p><i>Pseudoalteromas phenolica</i> was originally found in 2003 by Alim Isnansetyo and Yuto Kamei in the waters near the islands of Japan. Species in the genus <i>Pseudoalteromas</i> are typically heterotrophic but [some may] be oligotrophic, which is what our experiment is designed to culture. . . . The most significant attribute of this organism, though, is that it produces anti-methicillin-resistant <i>Staphylococcus aureus</i> (MRSA) substances (Isnansetyo and Kamei 2003). . . . Because this species, <i>Pseudoalteromas phenolica</i>, produces anti-MRSA substances, more focus should be put on how effective these substances are against <i>Staphylococcus aureus</i>. Experiments should be done to see if this species can be grown easily in large quantities to be produce [the] antibiotic.</p> <p><i>Several interesting attributes of the cultured bacteria and major points of significance are explained in detail with proper citations; future directions identified, and information related back to the experiment students conducted; demonstrates thorough understanding of experimental design.</i></p> |
| <b>Good/<br/>Acceptable</b>  | <p><i>Pseudoalteromonas phenolica</i>, found from B5-1, is significant because it can be used to treat MRSA, a bacterium that can cause skin infections, infected wounds and even pneumonia, that has resistance to many known antibiotics. It could possibly be used in a pharmaceutical product to treat illnesses caused by MRSA in the future. [In the future, we could] use the cryostocks to culture the organism . . . to confirm its identity . . . and attempt to find if our strain has anti-MRSA properties.</p> <p><i>Organism's important attribute of scientific interest identified and its significance described but not cited; future directions identified, and information related back to the experiment students conducted; demonstrates thorough understanding of the experimental design.</i></p>                                                                                                                                                                                                                                                                                                                             |
| <b>Needs<br/>Improvement</b> | <p>[<i>Pseudoalteromonas phenolica</i>] was first cultured in a lab near Tokyo, Japan in 2003. Strains are currently being researched for their antibiotic properties on anti-methicillin-resistant <i>Staphylococcus aureus</i>. 4 out of 11 groups at LSU cultured a <i>P. phenolica</i> showing that it is abundant in the Gulf of Mexico and readily grows through HTC. [Future directions include] identifying biological markers, studying its contributions to the ecosystem, and finding industrial, medical, and pharmaceutical applications.</p> <p><i>Organism briefly described and important attributes mentioned without</i></p>                                                                                                                                                                                                                                                                                                                                                                                                                                                                                                        |

|  |                                                                                                                                                                                                                                                                                                                                                                                                                                                            |
|--|------------------------------------------------------------------------------------------------------------------------------------------------------------------------------------------------------------------------------------------------------------------------------------------------------------------------------------------------------------------------------------------------------------------------------------------------------------|
|  | <p><i>expanding upon their significance or proper citations; future directions identified, but information not related back to the experiment conducted; demonstrates incorrect understanding of the experiment conducted (several students that semester characterized <u>P. phenolica</u> because not many cultures were initially successful, thus a few groups had to share the same initial broth cultures for the molecular analysis steps).</i></p> |
|--|------------------------------------------------------------------------------------------------------------------------------------------------------------------------------------------------------------------------------------------------------------------------------------------------------------------------------------------------------------------------------------------------------------------------------------------------------------|

516

517  
518  
519  
520  
521  
522  
523  
524  
525  
526  
527  
528  
529  
530  
531  
532  
533  
534  
535  
536  
537  
538  
539  
540  
541  
542  
543  
544  
545  
546  
547  
548

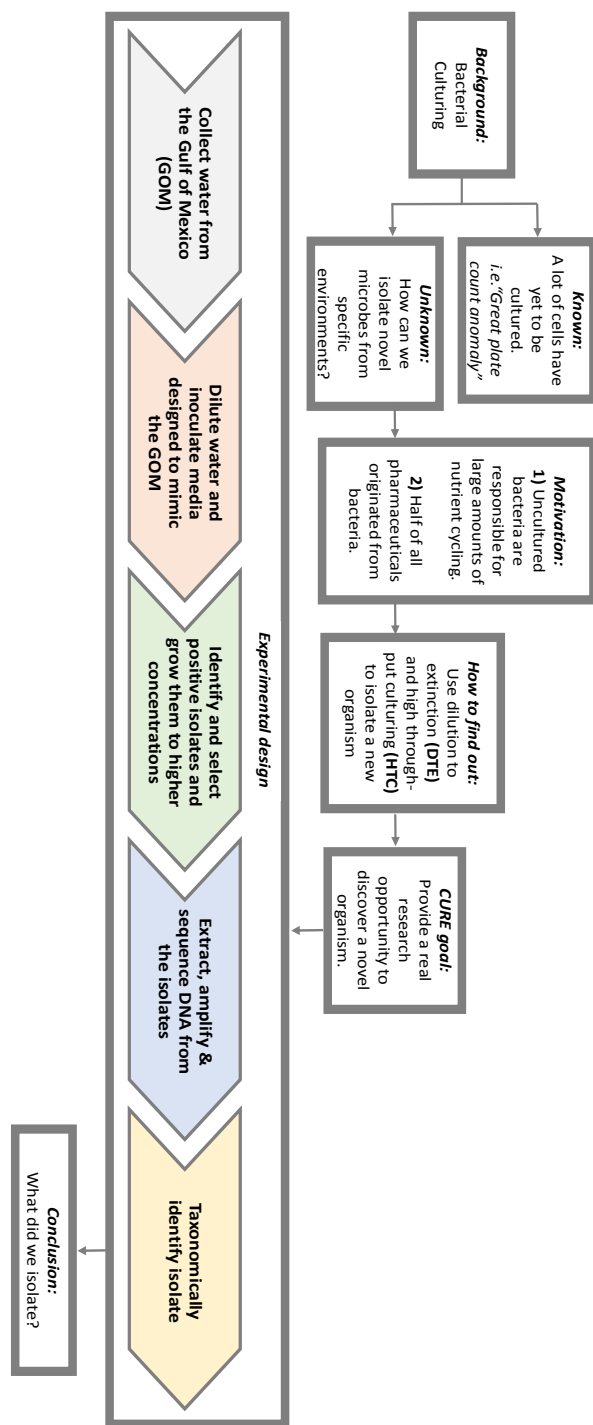

549 **Figure 1.** Flowchart of the mCURE background and experimental design. Using this flowchart, students are guided  
550 through the scientific process to gain an understanding of the relevance and importance of the project. Various  
551 segments of the course are color-coded (grey, orange, green, blue and yellow) corresponding to Table 1 where the  
552 week-by-week activities for each of these segments are described. This flowchart may be modified as needed to suit  
553 alternative projects using a similar protocol.

554

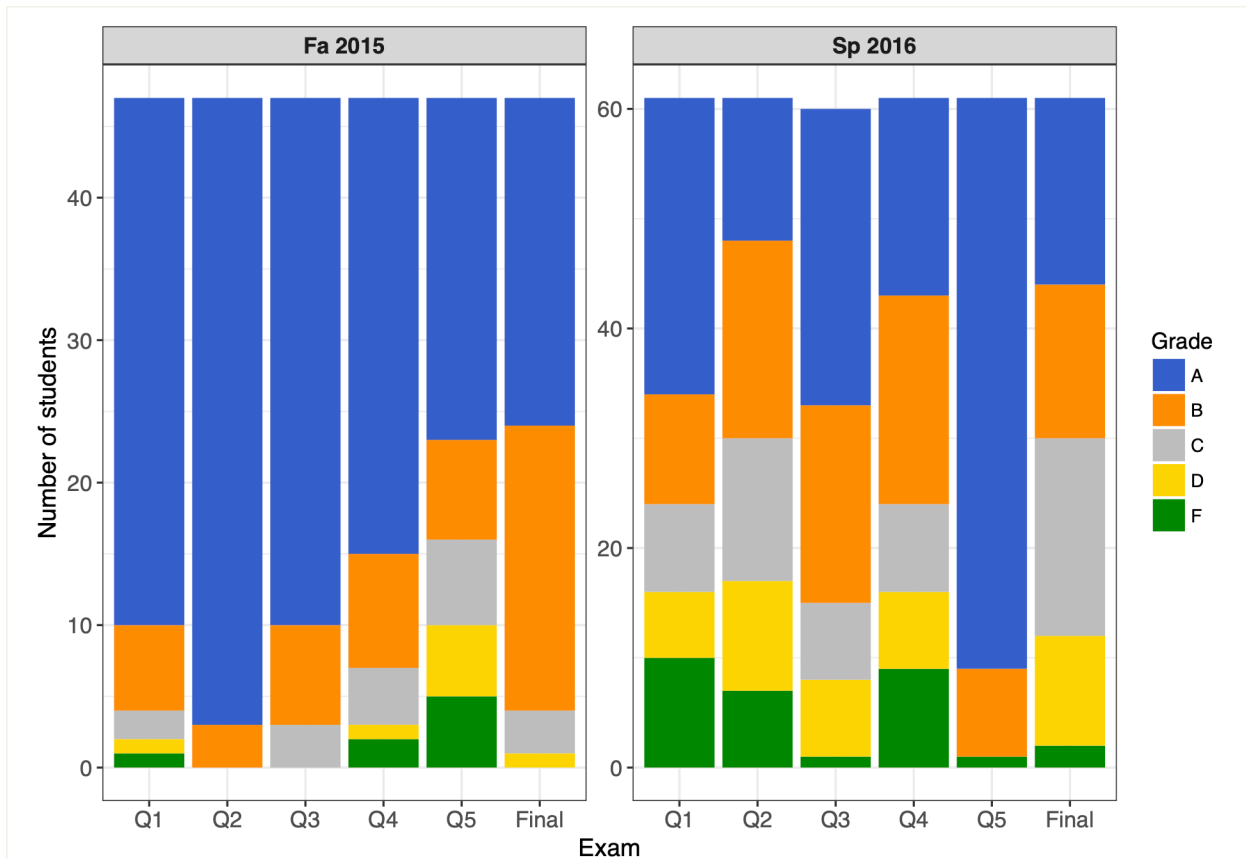

**Figure 2. Grade distributions for two sections of mCURE students during each of two semesters in the 2015-2016 school year.** Fall 2015 consisted of ~50 Honors College students majoring in biology. The topics for the five quizzes (Q1-Q5) were as follows: Q1 = Safety, Controls; Q2 = Experimental design, Scientific writing; Q3 = DNA extraction; Q4 = PCR; Q5 = Gel electrophoresis, Purpose of sequencing, Primer design. **Spring 2016** consisted of ~60 mostly non-biology major students. The topics for the five quizzes (Q1-Q5) were as follows: Q1 = Dilutions, Pipetting, Safety, Controls, Scientific writing; Q2 = Experimental design, Dilution, Pipetting, Controls; Q3 = DNA extraction; Q4 = PCR, Primer selection/design, Gel electrophoresis; Q5 = Purpose of sequencing, Sequence analysis. The grades for both semesters were assigned based on the following score criteria: A = 90-100%; B = 80-90%; C = 70-80%; D = 60-70%; F = <60%.

555

556

557

558

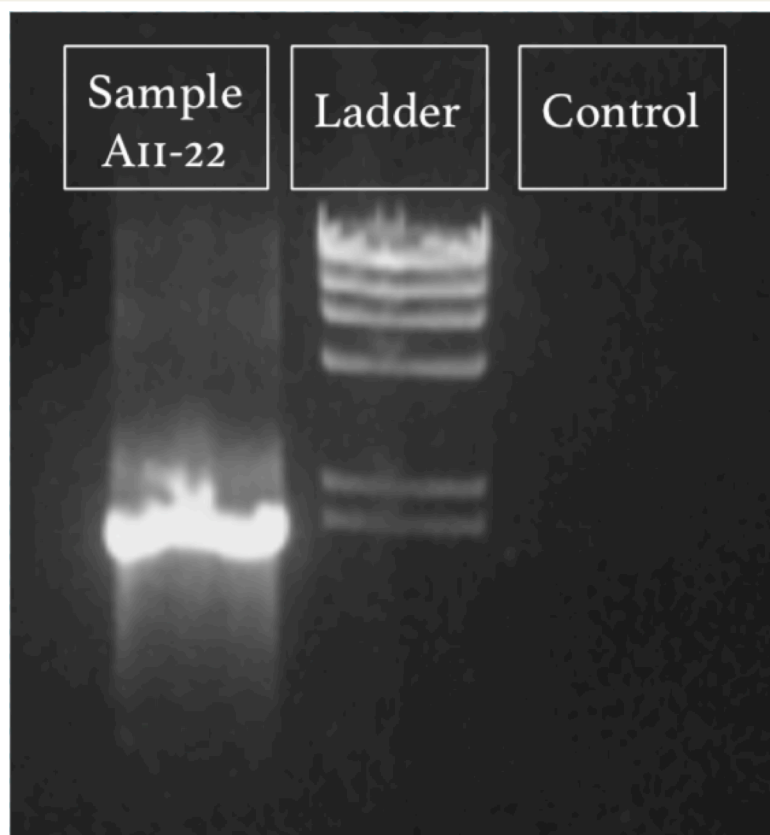

**Figure 3. Example gel electrophoresis image of a successful 16S rRNA gene PCR amplification from fall 2015.** Lanes labeled according to contents: “Sample A11-22” is the amplicon from isolate DNA (expected size 1466 bp); “Ladder” is Lambda HindIII digest ladder (NEB N3012S), with the lowest visible band at 2027 bp; “Control” is the negative control (water).
